# Supplementary material for: Detection of Anti-ZIKV NS1 IgA, IgM, and Combined IgA/IgM and Identification of IL-4 and IL-10 as Potential Biomarkers for Early ZIKV and DENV Infections in Hyperendemic Regions, Thailand
Source: MDPI journal article supplement (doi:10.3390/tropicalmed8050284), 2023-05-17
Supplement: s1 [file s1]

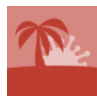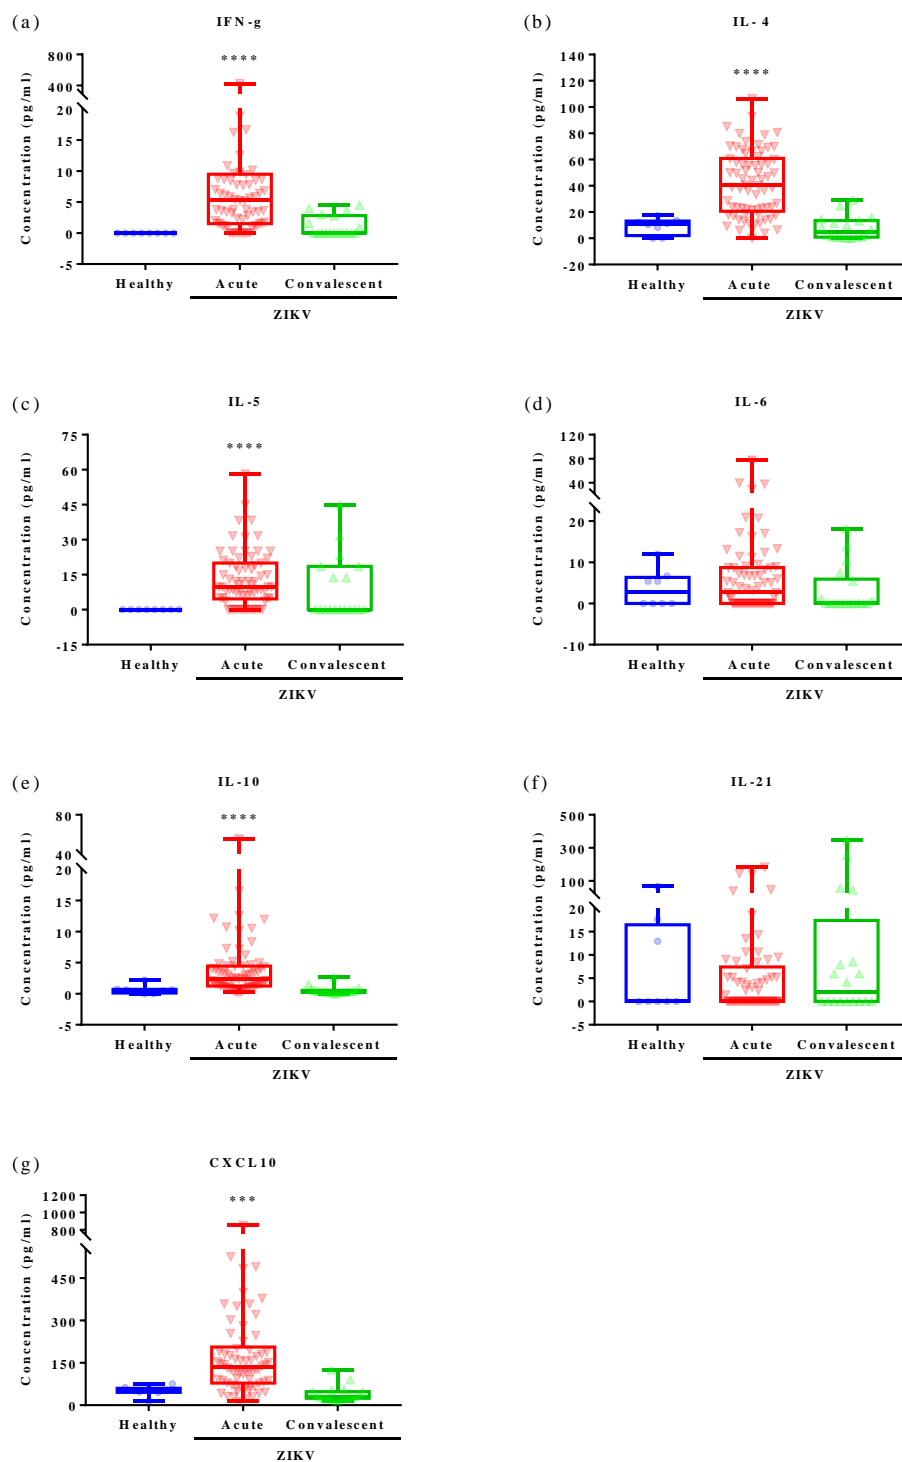

**Figure S1.** Levels of immune mediators in the acute and convalescent phases of ZIKV infection in comparison to healthy donors. All significant correlations are presented with the degree of significance indicated (\*  $p < 0.05$ , \*\*  $p < 0.01$ , \*\*\*  $p < 0.001$ , \*\*\*\*  $p < 0.0001$ ).

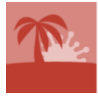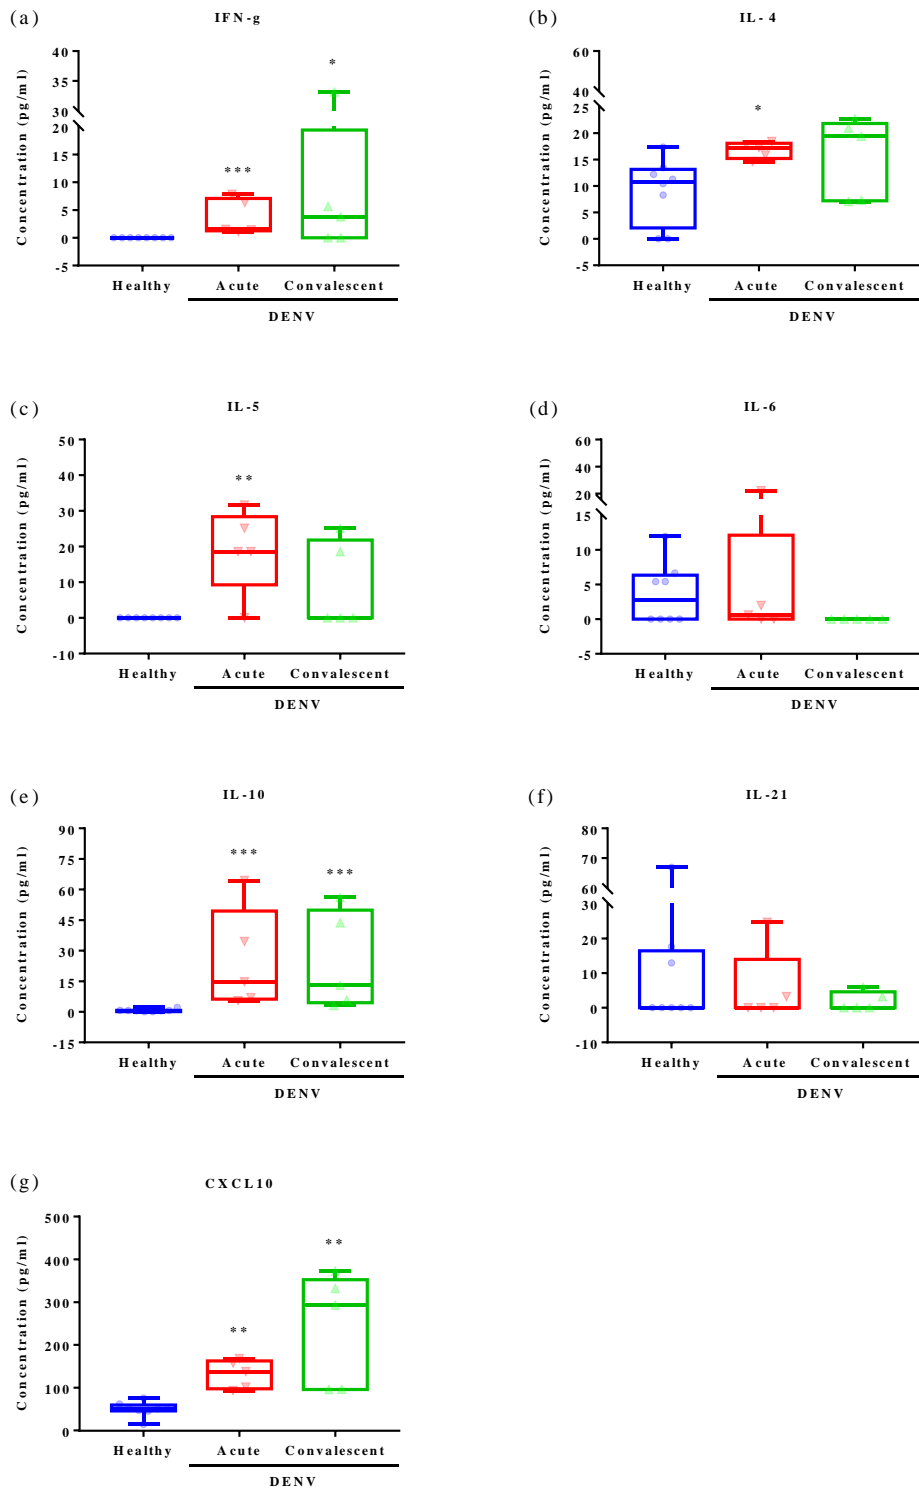

**Figure S2.** Levels of immune mediators in the acute and convalescent phase of DENV infection in comparison to healthy donors. All significant correlations are presented with the degree of significance indicated (\*  $p < 0.05$ , \*\*  $p < 0.01$ , \*\*\*  $p < 0.001$ , \*\*\*\*  $p < 0.0001$ ).

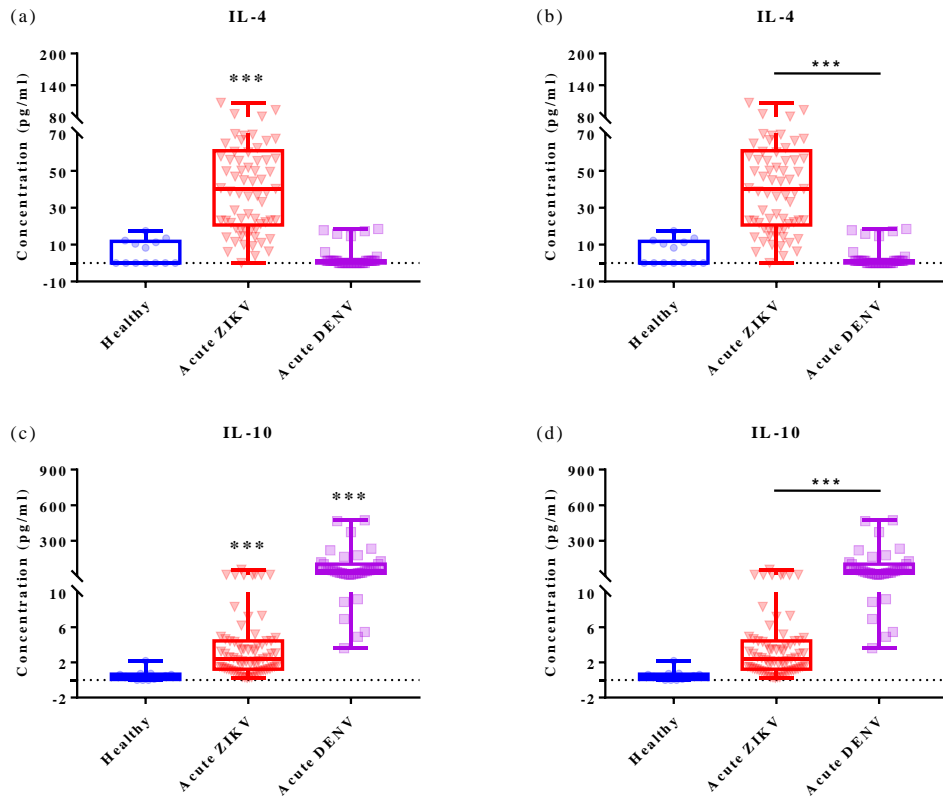

**Figure S3.** Levels of IL-4 and IL-10 in acute ZIKV cases ( $n = 70$ ) and acute DENV cases ( $n = 40$ ) in comparison to healthy donors ( $n = 13$ ). (Note: \*  $p < 0.05$ , \*\*  $p < 0.01$ , \*\*\*  $p < 0.001$ , \*\*\*\*  $p < 0.0001$ )

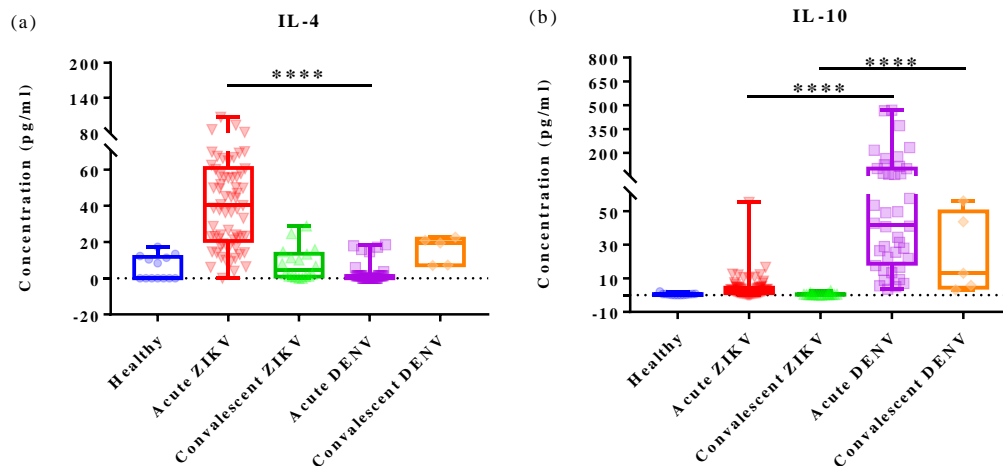

**Figure S4.** Differences in the levels of IL-4 and IL-10 in the acute and convalescent phases of ZIKV cases (acute,  $n = 70$ ; convalescent,  $n = 18$ ) compared with DENV cases (acute,  $n = 40$ ; convalescent,  $n = 5$ ). All significant correlations are presented with the degree of significance indicated (\*  $p < 0.05$ , \*\*  $p < 0.01$ , \*\*\*  $p < 0.001$ , \*\*\*\*  $p < 0.0001$ ).



**Table S1.** Changes in levels of IL-4 and IL-10 in the acute phase of infection among ZIKV-infected and DENV-infected cases compared to healthy donors.

| Type of serum samples            | Cytokine Concentration (pg/ml)                         |                                                              |
|----------------------------------|--------------------------------------------------------|--------------------------------------------------------------|
|                                  | IL-4                                                   | IL-10                                                        |
| <b>Acute ZIKV</b><br>(n = 70)    | 41.85 ± 24.85/2.97<br>40.44 (0-106.30)<br>35.93, 47.78 | 4.26 ± 7.06/0.84<br>2.44 (0.24-55.16)<br>2.58, 5.95          |
| <b>Acute DENV</b><br>(n = 40)    | 2.82 ± 5.49/0.87<br>1.29 (0-18.42)<br>1.06, 4.57       | 86.79 ± 116.20/18.37<br>42.02 (3.61-470.40)<br>49.63, 123.90 |
| <b>Healthy donor</b><br>(n = 13) | 0 ± 6.63/1.84<br>0 (0-17.39)<br>1.62, 9.63             | 0.48 ± 0.58/0.16<br>0.40 (0-2.18)<br>0.13, 0.83              |

**Note:** Data are the values (in pg per ml) of mean ± SD (standard deviation)/SEM (standard error of the mean), median (minimum–maximum), and 95% CI (confidence interval), respectively. The results were analyzed by Mann–Whitney U test.

**Table S2.** Differences in the levels of IL-4 and IL-10 in the acute phase of infection among ZIKV-infected patients, DENV-infected patients, and healthy donors.

| Type of serum samples                           | Type of Cytokine <sup>a</sup> |                 |
|-------------------------------------------------|-------------------------------|-----------------|
|                                                 | IL-4                          | IL-10           |
| <b>Acute ZIKV</b><br>vs<br><b>Healthy donor</b> | < 0.001;<br>***               | < 0.001;<br>*** |
| <b>Acute DENV</b><br>vs<br><b>Healthy donor</b> | 0.735;<br><i>ns</i>           | < 0.001;<br>*** |
| <b>Acute ZIKV</b><br>vs<br><b>Acute DENV</b>    | < 0.001;<br>***               | < 0.001;<br>*** |

<sup>a</sup>All significant correlations are presented with the degree of significance indicated (\*  $p < 0.05$ , \*\*  $p < 0.01$ , \*\*\*  $p < 0.001$ , \*\*\*\*  $p < 0.0001$ , *ns* = not significant); the results are analyzed by Mann–Whitney U test.

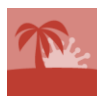

**Table S3.** Changes in levels of IL-4 and IL-10 in the acute and convalescent phases of infection among ZIKV-infected and DENV-infected cases compared to healthy donors.

| Type of serum samples                | Cytokine Concentration (pg/ml)                         |                                                              |
|--------------------------------------|--------------------------------------------------------|--------------------------------------------------------------|
|                                      | IL-4                                                   | IL-10                                                        |
| <b>Acute ZIKV</b><br>(n = 70)        | 41.85 ± 24.85/2.97<br>40.44 (0-106.30)<br>35.93, 47.78 | 4.26 ± 7.06/0.84<br>2.44 (0.24-55.16)<br>2.58, 5.95          |
| <b>Convalescent ZIKV</b><br>(n = 18) | 7.90 ± 8.77/2.07<br>4.41 (0-28.81)<br>3.54, 12.26      | 0.54 ± 0.63/0.15<br>0.35 (0-2.64)<br>0.23, 0.85              |
| <b>Acute DENV</b><br>(n = 40)        | 2.82 ± 5.49/0.87<br>1.29 (0-18.42)<br>1.06, 4.57       | 86.79 ± 116.20/18.37<br>42.02 (3.61-470.40)<br>49.63, 123.90 |
| <b>Convalescent DENV</b><br>(n = 5)  | 15.50 ± 7.66/3.43<br>19.43 (7.08-22.72)<br>5.99, 25.02 | 24.35 ± 23.99/10.73<br>13.08 (3.13-56.09)<br>-5.43, 54.14    |
| <b>Healthy donor</b><br>(n = 13)     | 0 ± 6.63/1.84<br>0 (0-17.39)<br>1.62, 9.63             | 0.48 ± 0.58/0.16<br>0.40 (0-2.18)<br>0.13, 0.83              |

**Note:** Data are the values (in pg per ml) of mean ± SD (standard deviation)/SEM (standard error of the mean), median (minimum–maximum), and 95% CI (confidence interval), respectively. The results were analyzed by Mann–Whitney U test.

**Table S4.** Differences in the levels of IL-4 and IL-10 in the acute and convalescent phases of infection among ZIKV-infected patients and DENV-infected patients.

| Type of serum samples                             | Type of Cytokine <sup>a</sup> |                   |
|---------------------------------------------------|-------------------------------|-------------------|
|                                                   | IL-4                          | IL-10             |
| <b>Acute ZIKV vs<br/>Acute DENV</b>               | < 0.0001;<br>****             | < 0.0001;<br>**** |
| <b>Convalescent ZIKV vs<br/>Convalescent DENV</b> | 0.0909;<br><i>ns</i>          | < 0.0001;<br>**** |

<sup>a</sup>All significant correlations are presented with the degree of significance indicated (\*  $p < 0.05$ , \*\*  $p < 0.01$ , \*\*\*  $p < 0.001$ , \*\*\*\*  $p < 0.0001$ , *ns* = not significant); the results were analyzed by Mann–Whitney U test.
